# Supplementary material for: Cytochrome b5 protects photoreceptors from light stress-induced lipid peroxidation and retinal degeneration
Source: PubMed Central journal article supplement (PMC5712525; doi:10.1038/s41514-017-0019-6), 2017-12-04

## **SUPPLEMENTARY MATERIAL**

**Chen *et al.* Cytochrome b5 protects photoreceptors from light stress-induced lipid peroxidation and retinal degeneration**

### **LIST OF SUPPLEMENTARY MATERIAL**

TABLE S1: Fly stocks used in this study

TABLE S2: Primers used in this study.

TABLE S3: Primers used in this study.

### **SUPPLEMENTARY FIGURE LEGENDS**

FIGURE S1: Cyt-b5 transcript levels are not reduced in day 6 flies.

FIGURE S2: The Cyt-b5 transgene does not suppress blue light-induced retinal degeneration due to position (insertion) effect.

FIGURE S3: Fatty acid composition in the eye is not altered by overexpression of Cyt-b5.

FIGURE S4: Blue light-induced increase in H<sub>2</sub>O<sub>2</sub> levels requires Ca<sup>2+</sup> influx.

FIGURE S5: Overexpression of Cyt-b5 does not inhibit visual function.

FIGURE S6: Treatment with Vitamin E, but not overexpression of Sod1, partially suppresses blue light-induced retinal degeneration.

| Fly stock                           | Detailed genotype                                                                                                                     | Source           | Stock number | Reference |
|-------------------------------------|---------------------------------------------------------------------------------------------------------------------------------------|------------------|--------------|-----------|
| <i>w<sup>1118</sup></i>             | <i>w<sup>1118</sup></i>                                                                                                               | Bloomington      | BL3605       | 1         |
| <i>ninaE<sup>7</sup></i>            | <i>w<sup>1118</sup>; ninaE<sup>7</sup></i>                                                                                            | Bloomington      | BL1613       | 2,3       |
| <i>trp<sup>9</sup></i>              | <i>w<sup>*</sup>; trp<sup>9</sup></i>                                                                                                 | Bloomington      | BL9046       | 4         |
| <i>LGMR-Gal4</i>                    | <i>y<sup>1</sup> w<sup>*</sup>; wg<sup>Sp-1</sup>/CyO;</i><br><i>P{longGMR-GAL4}3/TM2</i>                                             | Bloomington      | BL8121       | 5         |
| <i>UAS-luciferase</i>               | <i>w<sup>*</sup>; P{nSyb-</i><br><i>MKII::GAL4DBDo}attP24,</i><br><i>P{QUAS-</i><br><i>p65AD::CaM}2/CyO; P{UAS-</i><br><i>LUC.D}3</i> | Bloomington      | BL61678      | 6         |
| <i>UAS-Cyt-b5</i>                   | <i>P{UAS-dappled}3b</i>                                                                                                               | Deborah Kimbrell |              | 7         |
| <i>UAS-Hmgcr</i>                    | <i>P{UAS-Hmgcr.vD}3</i>                                                                                                               | Ruth Lehmann     |              | 8         |
| <i>UAS-Sod1</i>                     | <i>w<sup>1</sup>; P{UAS-Sod1.A}B37</i>                                                                                                | Bloomington      | BL24750      | 9         |
| <i>cn bw</i>                        | <i>cn<sup>1</sup> bw<sup>1</sup></i>                                                                                                  | Bloomington      | BL264        | 10        |
| <i>cytb<sup>501857</sup></i>        | <i>P{PZ}Cyt-b5<sup>501857</sup>, cn<sup>1</sup>/CyO;</i><br><i>ry<sup>506</sup></i>                                                   | Bloomington      | BL11101      | 7,11      |
| <i>cn bw; LGMR-Gal4</i>             | <i>cn<sup>1</sup> bw<sup>1</sup>; P{longGMR-GAL4}</i><br><i>e3/TM2</i>                                                                | This study       |              |           |
| <i>cn bw; UAS-luciferase</i>        | <i>cn<sup>1</sup> bw<sup>1</sup>; P{UAS-LUC.D}3</i>                                                                                   | This study       |              |           |
| <i>cn bw; UAS-Cyt-b5</i>            | <i>cn<sup>1</sup> bw<sup>1</sup>; P{UAS-dappled}3b</i>                                                                                | This study       |              |           |
| <i>cn bw; UAS-Hmgcr</i>             | <i>cn<sup>1</sup> bw<sup>1</sup>; P{UAS-Hmgcr.vD}</i>                                                                                 | This study       |              |           |
| <i>cn bw, cytb<sup>501857</sup></i> | <i>cn<sup>1</sup> bw<sup>1</sup> cytb<sup>501857</sup>/CyO</i>                                                                        | This study       |              |           |
| <i>cn bw; UAS-Sod1</i>              | <i>cn bw; P{UAS-Sod1.A}B37</i>                                                                                                        | This study       |              |           |

**Table S1.** Fly stocks used in this study.

## SUPPLEMENTARY REFERENCES FOR TABLE S1

- 1 Rabinow, L. & Birchler, J. A. A dosage-sensitive modifier of retrotransposon-induced alleles of the *Drosophila* white locus. *EMBO J* **8**, 879-889 (1989).
- 2 Kumar, J. P. & Ready, D. F. Rhodopsin plays an essential structural role in *Drosophila* photoreceptor development. *Development* **121**, 4359-4370 (1995).
- 3 Kurada, P. & O'Tousa, J. E. Retinal degeneration caused by dominant rhodopsin mutations in *Drosophila*. *Neuron* **14**, 571-579 (1995).
- 4 Wang, T., Jiao, Y. & Montell, C. Dissecting independent channel and scaffolding roles of the *Drosophila* transient receptor potential channel. *J Cell Biol* **171**, 685-694, doi:10.1083/jcb.200508030 (2005).
- 5 Wernet, M. F. *et al.* Homothorax switches function of *Drosophila* photoreceptors from color to polarized light sensors. *Cell* **115**, 267-279 (2003).
- 6 Gao, X. J. *et al.* A transcriptional reporter of intracellular Ca(2+) in *Drosophila*. *Nat Neurosci* **18**, 917-925, doi:10.1038/nn.4016 (2015).
- 7 Kleinhesselink, K., Conway, C., Sholer, D., Huang, I. & Kimbrell, D. A. Regulation of hemocytes in *Drosophila* requires dappled cytochrome b5. *Biochem Genet* **49**, 329-351, doi:10.1007/s10528-010-9411-7 (2011).
- 8 Van Doren, M., Broihier, H. T., Moore, L. A. & Lehmann, R. HMG-CoA reductase guides migrating primordial germ cells. *Nature* **396**, 466-469, doi:10.1038/24871 (1998).
- 9 Anderson, P. R., Kirby, K., Hilliker, A. J. & Phillips, J. P. RNAi-mediated suppression of the mitochondrial iron chaperone, frataxin, in *Drosophila*. *Hum Mol Genet* **14**, 3397-3405, doi:10.1093/hmg/ddi367 (2005).
- 10 Tearle, R. Tissue specific effects of ommochrome pathway mutations in *Drosophila melanogaster*. *Genet Res* **57**, 257-266 (1991).
- 11 Russell, M. A., Ostafichuk, L. & Scanga, S. Lethal P-lacZ insertion lines expressed during pattern respecification in the imaginal discs of *Drosophila*. *Genome* **41**, 7-13 (1998).

| <b>Gene</b>                                      | <b>Symbol</b>      | <b>Flybase ID</b> | <b>Mutant allele</b>         |
|--------------------------------------------------|--------------------|-------------------|------------------------------|
| <i>white</i>                                     | <i>w</i>           | FBgn0003996       | <i>w<sup>1118</sup></i>      |
| <i>neither inactivation nor afterpotential E</i> | <i>ninaE (Rh1)</i> | FBgn0002940       | <i>ninaE<sup>7</sup></i>     |
| <i>transient receptor potential</i>              | <i>trp</i>         | FBgn0003861       | <i>trp<sup>9</sup></i>       |
| <i>Cytochrome b5</i>                             | <i>Cyt-b5</i>      | FBgn0264294       | <i>cytb5<sup>01857</sup></i> |
| <i>HMG Coenzyme A reductase</i>                  | <i>Hmgcr</i>       | FBgn0263782       |                              |
| <i>Superoxide dismutase 1</i>                    | <i>Sod1</i>        | FBgn0003462       |                              |
| <i>cinnabar</i>                                  | <i>cn</i>          | FBgn0000337       | <i>cn<sup>1</sup></i>        |
| <i>brown</i>                                     | <i>bw</i>          | FBgn0000241       | <i>bw<sup>1</sup></i>        |

**Table S2.** Genes examined in this study.

| <b>Gene</b>                                        | <b>Symbol</b> | <b>Flybase ID</b> | <b>Primer (5' – 3')</b>                                      |
|----------------------------------------------------|---------------|-------------------|--------------------------------------------------------------|
| <i>Cytochrome b5</i>                               | <i>Cyt-b5</i> | FBgn0264294       | F: CCAAGCACAACACGAACAAG<br>R: GCCAACGTCCTCAAAGTTCT           |
| <i>eukaryotic translation initiation factor 1A</i> | <i>eIF1A</i>  | FBgn0026250       | F: GCTGGGCAACGGTCGTCTGGAGGC<br>R: CGTCTTCAGGTTCTGGCCTCGTCCGG |
| <i>Ribosomal protein L32</i>                       | <i>RpL32</i>  | FBgn0002626       | F: GCTAAGCTGTCGCACAAATG<br>R: CGTTGTGCACCAGGAAGCTT           |
| <i>Luciferase</i>                                  | <i>Luc</i>    |                   | F: CAACTGCATAAGGCTATGAAGAGA<br>R: ATTTGTATTCAGCCCATATCGTTT   |

**Table S3.** Primers used in this study.

## SUPPLEMENTARY FIGURE LEGENDS

Fig. S1. *Cyt-b5* transcript levels are not reduced in day 6 flies. Bar plot showing qPCR analysis of *Cyt-b5* in dissected eyes from male flies of the indicated ages and genotype. The expression of *Cyt-b5* was normalized to the geometric mean of two reference genes (*eIF1A* and *RpL32*) and is shown relative to day 1 *w<sup>1118</sup>*, which is set to one. Data represent mean  $\pm$  s.d. ( $n = 3$ ).  $p$  values, Student's t-test between indicated samples. ns, not significant.

Fig. S2. The *Cyt-b5* transgene does not suppress blue light-induced retinal degeneration due to position (insertion) effect. Confocal images of adult retinas from flies carrying single copy transgenes for *LGMR-Gal4*, *Luciferase* or *Cyt-b5* in the *cn bw* background exposed to 8h blue light at 6 days post-eclosion. Scale bars: 10  $\mu$ m. Mean percentage rhabdomere loss is shown ( $n = 2$  light treatments; 5 animals/experiment).

Fig. S3. Fatty acid composition in the eye is not altered by overexpression of *Cyt-b5*. (A) Retinas were dissected from adult male *w<sup>1118</sup>* flies 1 and 6 days post-eclosion, or 6 day old male flies expressing single copy of the indicated *UAS* transgenes driven by *LGMR-Gal4* in the *cn bw* background. Fatty acids were extracted and quantified. The molar percentage of each fatty acid was determined for each sample. (B) The ratio of 16:1 to 16:0 fatty acids were determined for each sample. (C) The ratio of unsaturated to saturated fatty acids were compared for each sample. All data represent mean  $\pm$  s.d. ( $n = 3$  for all samples except *UAS-luciferase* with  $n = 2$ ).  $p$ -values indicated by asterisks for significant comparisons were determined by ANOVA followed by Tukey-HSD using GraphPad Prism 7.03 between *w<sup>1118</sup>* day 6 and indicated age/genotype (\*,  $p < 0.05$ ; \*\*  $p < 0.01$ ). *UAS-luciferase* samples were not included in the statistical analysis.

Fig. S4. Blue light-induced increase in  $H_2O_2$  levels requires  $Ca^{2+}$  influx.  $H_2O_2$  levels were measured in retinas from *w<sup>1118</sup>* and *trp<sup>9</sup>* flies exposed to 2h blue light or dark control at 6 days

post-eclosion. Flies were raised in the dark prior to blue light exposure. H<sub>2</sub>O<sub>2</sub> concentrations were determined relative to total amount of protein from 10 eyes, and data are plotted as individual points. FDR, pairwise Wilcoxon Rank Sum Test between different genotypes under the same light treatment ( $n = 5$  light treatments).

Fig. S5. Overexpression of Cyt-b5 does not inhibit visual function. Electroretinograms (ERG) performed on 6 day old flies expressing single copy transgenes for *Luciferase* or *Cyt-b5* driven by *LGMR-Gal4* in the *cn bw* background. Light pulses (4s pulse with 20s intervals, red or blue light) are indicated by the bars, and ERG recordings are shown by the red trace.

Fig. S6. Treatment with Vitamin E, but not overexpression of Sod1, partially suppresses blue light-induced retinal degeneration. (A) Confocal images of adult retinas from flies expressing single copy transgenes for *Sod1* or *Luciferase* driven by *LGMR-Gal4* in the *cn bw* background exposed to 8h blue light or dark at 6 days post-eclosion. (B) Confocal images of adult retinas from *w<sup>1118</sup>* flies grown on food supplemented with Vitamin E (VitE) or vehicle control (ethanol) for 6 days post-eclosion prior to exposure to 8h blue light or dark control. (C) Box plots showing rhabdomere loss quantified using the confocal images. FDR, pairwise Wilcoxon Rank Sum Test between genotypes or Vitamin E treatment under the same light exposure ( $n = 4$  light treatments; 5 animals/experiment). ns, not significant. (D) H<sub>2</sub>O<sub>2</sub> levels were measured in retinas from flies of the indicated genotypes or Vitamin E treatment exposed to 2h blue light or dark control. H<sub>2</sub>O<sub>2</sub> concentrations were determined relative to total amount of protein from 10 eyes, and data are plotted as individual points. *p*-values, ANOVA followed by Tukey-HSD between different genotypes or treatment under the same light exposure ( $n = 5$  light treatments). ns, not significant.

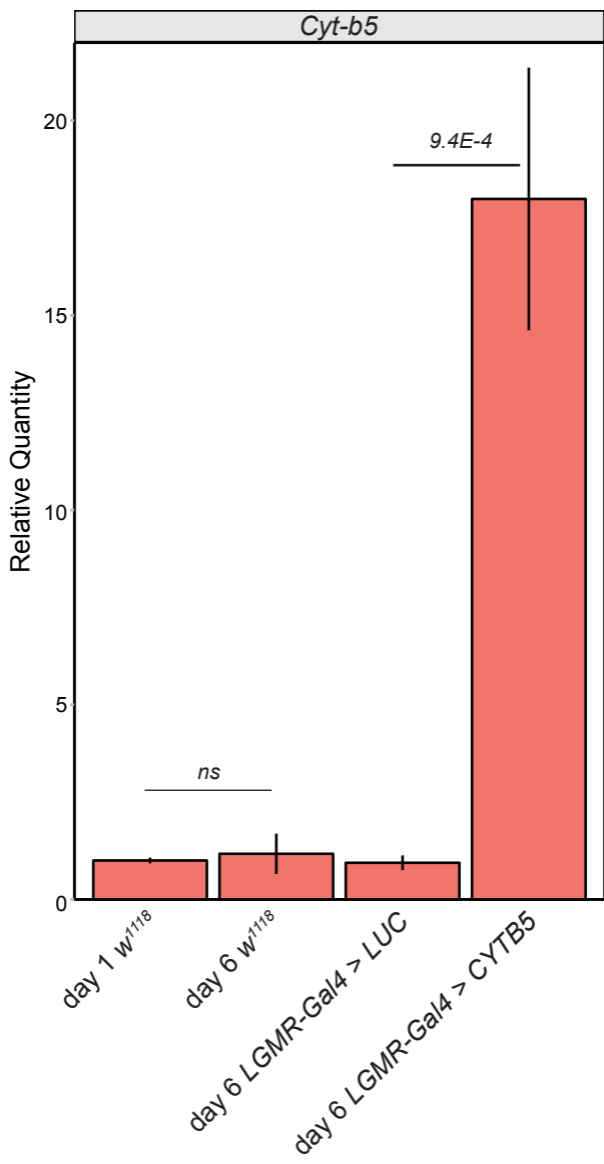



# Chen\_FigS2

*cn bw;*

*LGMR-Gal4/+*

*UAS-Luc/+*

*UAS-Cyt-b5/+*

day 6

8h blue

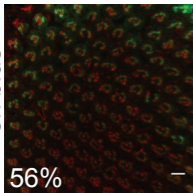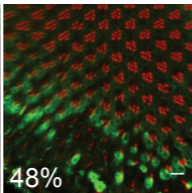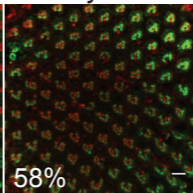

rhabdomere loss

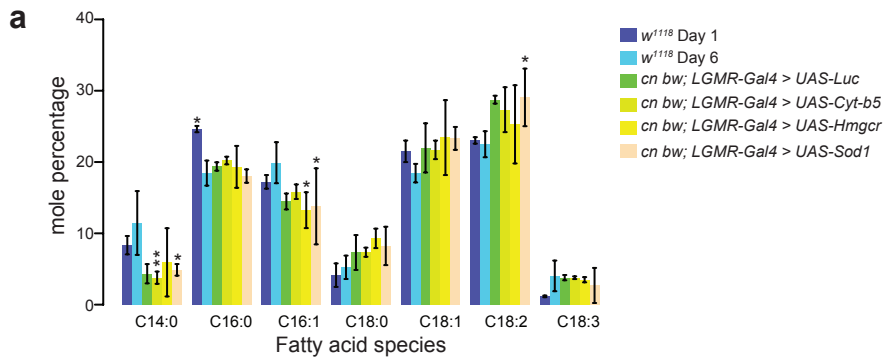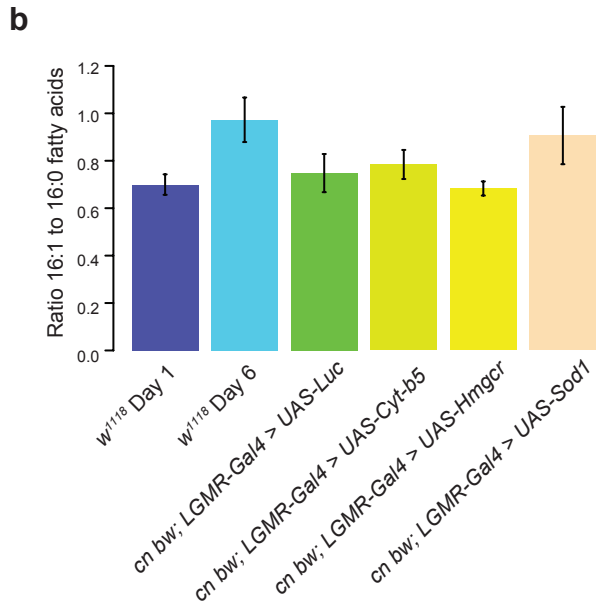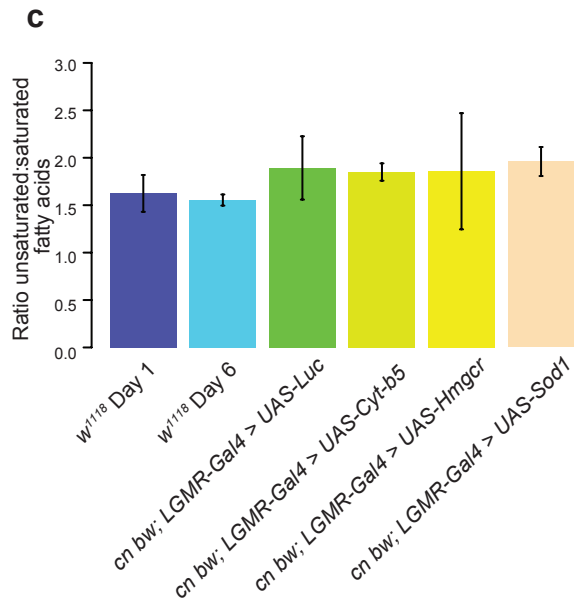

# Chen\_FigS4

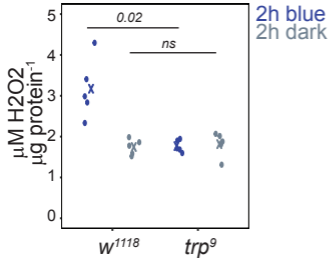

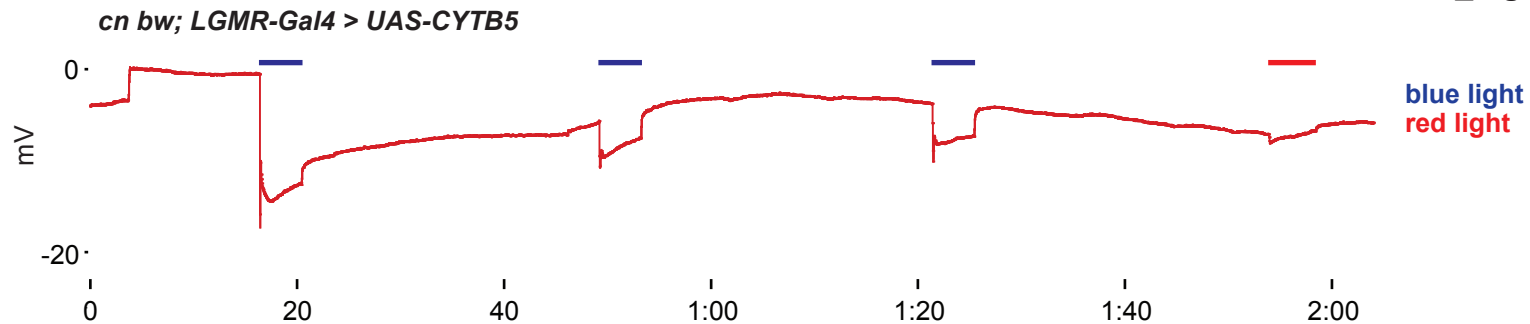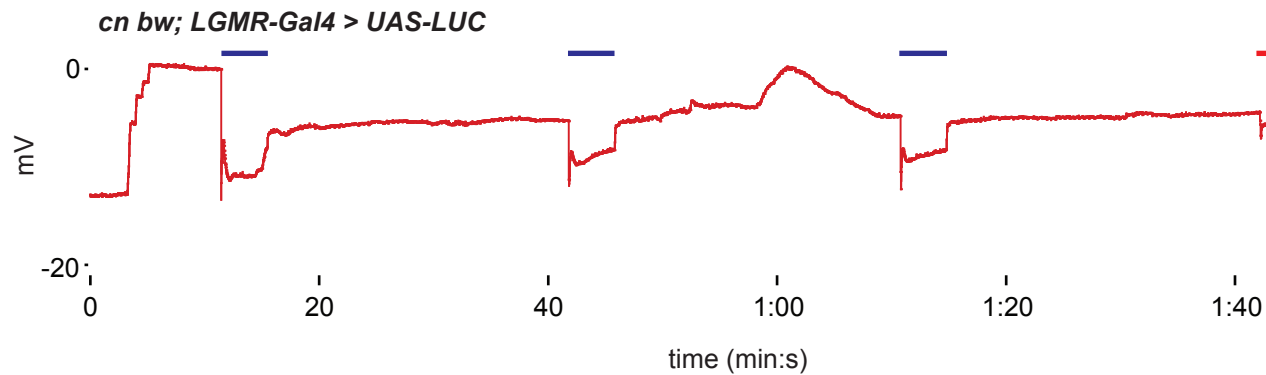

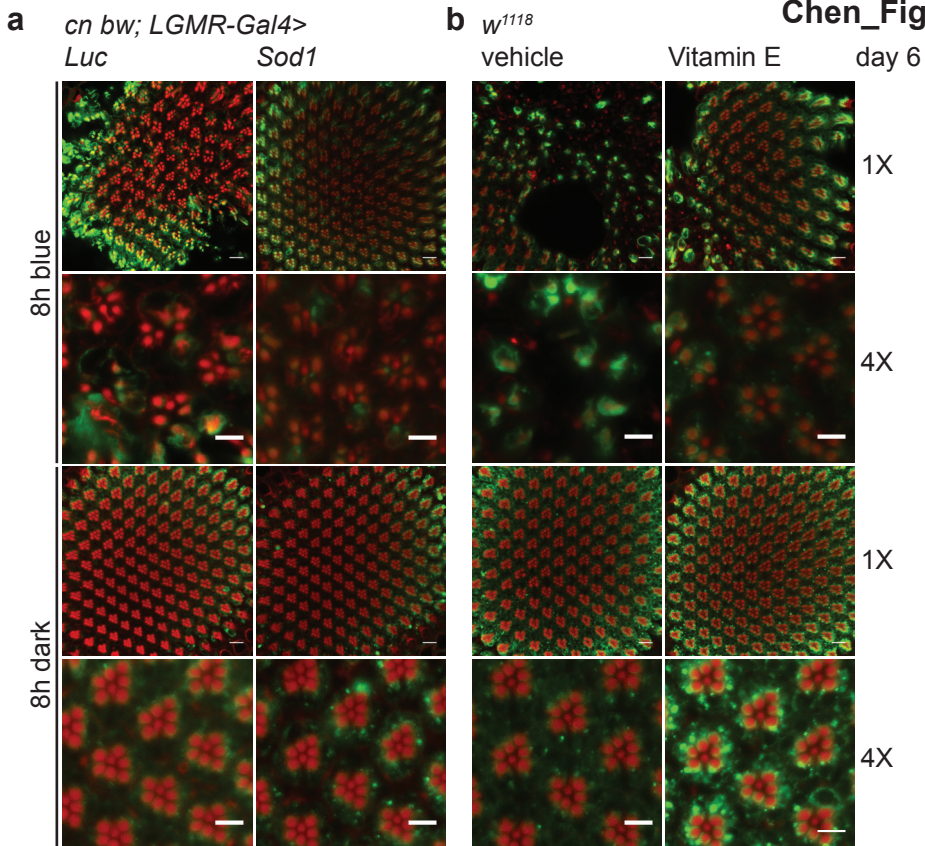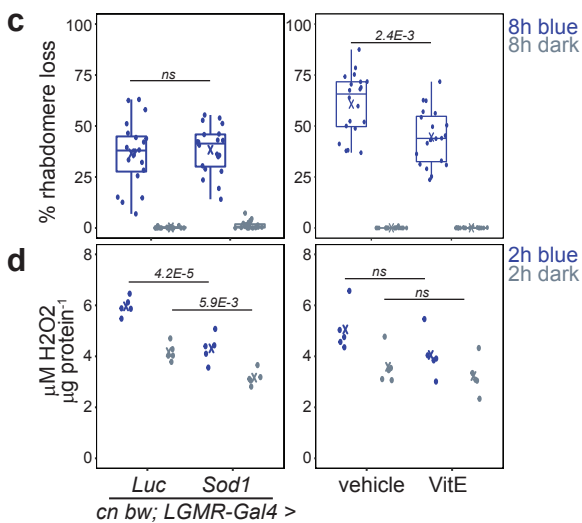

Supplement: 41514_2017_19_MOESM1_ESM.pdf [file 41514_2017_19_MOESM1_ESM.pdf]
